# Supplementary material
Source: PubMed Central journal article supplement (PMC2840504)
Supplement: 0913001107_pnas.200913001SI.pdf [file 0913001107_pnas.200913001SI.pdf]

# Supporting Information

Wang et al. 10.1073/pnas.0913001107

## SI Methods

**Whole-Cell Voltage-Clamp Recording.** Experiments were performed at room temperature. Fire-polished patch pipettes were made from 1.28-mm borosilicate capillary glass (Warner Instruments) with a tip resistance of 1–2 M $\Omega$ . Tight seals (>1 G $\Omega$ ) were obtained before breaking into the whole-cell mode. The series resistance during recording varied from 5–10 M $\Omega$  and was not compensated. The pipette and bath solutions contained 140 mM *N*-methyl-D-glucamine chloride, 1 mM MgCl<sub>2</sub>, 3 mM EGTA, and 5 mM Hepes (pH 7.4 with HCl). MgATP (2 mM) was added to the pipette solution. Current records were low-pass-filtered (2 kHz; Bessel; four-pole filter, –3 dB), digitized (20 kHz, 16-bit resolution), and stored on computer disk for later analysis using pCLAMP 8 software (Axon Instruments). A voltage ramp protocol was used ( $\pm$ 80 mV). The net CFTR current was calculated as the difference in current between +80 and 0 mV after bath application of a mixture of 10  $\mu$ M forskolin, 100  $\mu$ M 3-isobutyl-1-methylxanthine, and 40  $\mu$ M 8-(4-chlorophenylthio)-cAMP and subtraction of the current remaining after addition of a CFTR inhibitor (400  $\mu$ M glibenclamide). Whole-cell capacitance was obtained from the amplifier after the compensation of the capacitive current. The mean current density was calculated as the ratio of the net whole-cell current and cell capacitance (pA/pF).

**Surface Biotinylation and Immunoprecipitations.** Cell surface proteins were biotinylated for 30 min at 4 °C with EZ-Link Sulfo-NHS-SS-Biotin (Pierce) (1 mg/mL) in PBS (pH 8.0) or with PBS only

(control experiment). After the biotinylation step, the excess biotin was neutralized by incubating cells for 10 min at 4 °C with 1% BSA in PBS. Cells were then rinsed with PBS and incubated with or without 100 mM 2-mercaptoethanesulfonic acid (MESNA) in 50 mM Tris, 100 mM NaCl, 1 mM EDTA, 0.2% BSA, pH 8.6. After the MESNA stripping step, the excess MESNA was neutralized by incubating cells for 10 min at 4 °C with 1% BSA in PBS. Biotinylated cells were lysed in 1% Triton X-100 in PBS with protease inhibitors (complete, EDTA-free; Roche Applied Science) (1 mL per dish), and cell lysates were cleared by centrifugation (16,000  $\times$  g for 15 min at 4 °C). The total protein content of supernatants was determined by the MicroBCA protein assay kit (Pierce). Ten milligrams of total protein from each sample was incubated with streptavidin beads (streptavidin-agarose; Novagen) to isolate cell surface proteins, and 1 mg of total protein was immunoprecipitated with an anti-CFTR C-terminus antibody (24-1 monoclonal antibody; R&D Systems) cross-linked to A/G agarose beads to determine total CFTR expression. Streptavidin pull-downs and immunoprecipitations were carried out overnight at 4 °C. The beads were then rinsed three times with 1% Triton X-100 in PBS, and proteins were eluted by incubation at 37 °C for 30 min with reducing Laemmli buffer (plus 50 mM DTT, 1.2 (v/v)  $\beta$ -mercaptoethanol). After a brief centrifugation (1 min, 3,000  $\times$  g), proteins in the supernatants were resolved by SDS/PAGE on a 4–15 (w/v) acrylamide gel and then transferred to PVDF membrane. Blots were performed with the anti-CFTR C-terminus antibody described previously (1).

1. Wang W, et al. (2005) Reversible silencing of CFTR chloride channels by glutathionylation. *J Gen Physiol* 125:127–141.

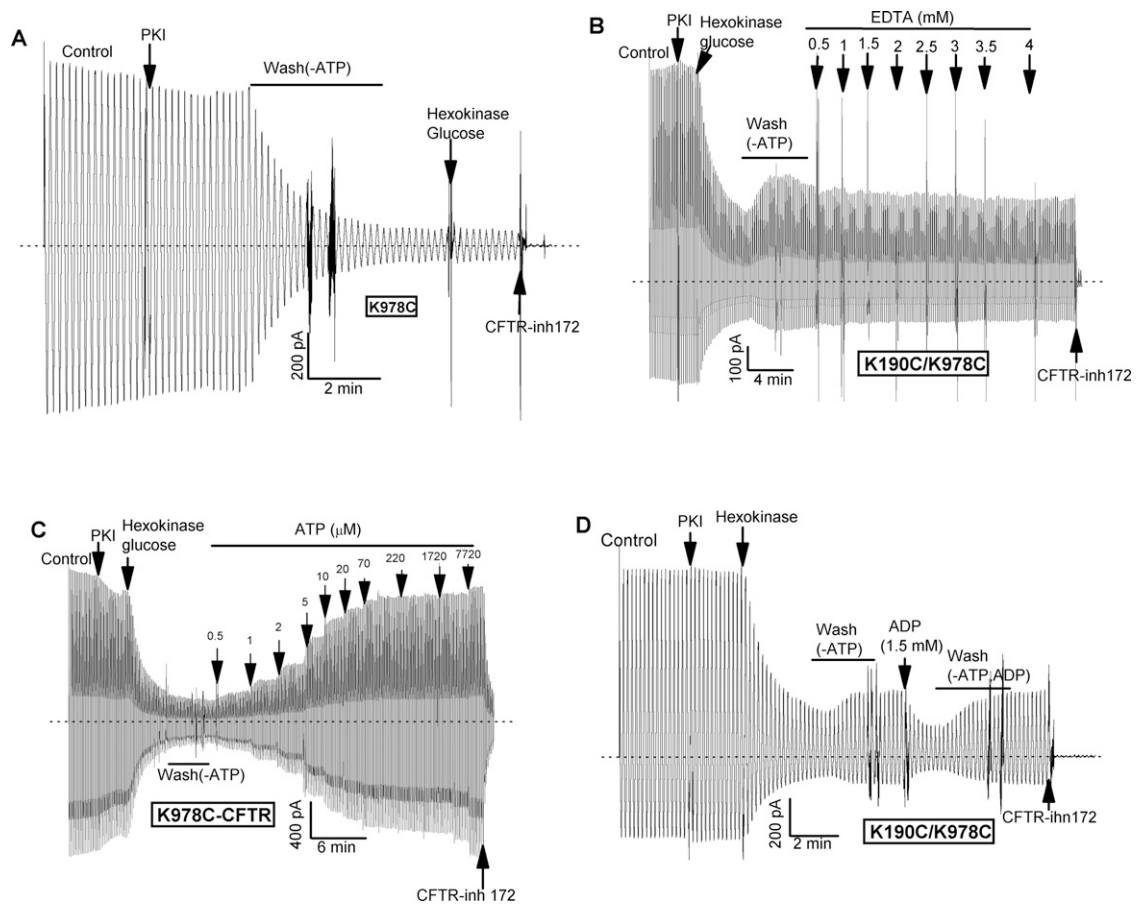

**Fig. S1.** ATP and ADP sensitivities of loop mutants. (A and B) Certain loop mutants exhibit stable ATP-independent currents irrespective of how ATP is removed. (A) K978C-CFTR: ATP removed by bath perfusion, followed by addition of hexokinase (24 U/mL)/glucose (10 mM). (B) ATP was first removed by addition of hexokinase/glucose, followed by bath perfusion with ATP-free solution. EDTA was then added to chelate bath  $Mg^{2+}$  (3 mM  $Mg^{2+}$  in bath solution), a maneuver known to accelerate ATP unbinding from CFTR (notably, from NBD1 [Aleksandrov L, Aleksandrov A, Riordan JR (2008)  $Mg^{2+}$ -dependent ATP occlusion at the first nucleotide-binding domain (NBD1) of CFTR does not require the second (NBD2). *Biochem J* 416:129–136]). (C) Representative ATP titration for the K978C constitutive mutant. Current was activated by PKA/ATP, and ATP was then removed by hexokinase/glucose, followed by bath perfusion (conditions described in Fig. 1) before performing the ATP titration. (D) ADP reversibly inhibits the constitutive activity of the K190C/K978C-CFTR mutant in the absence of ATP.

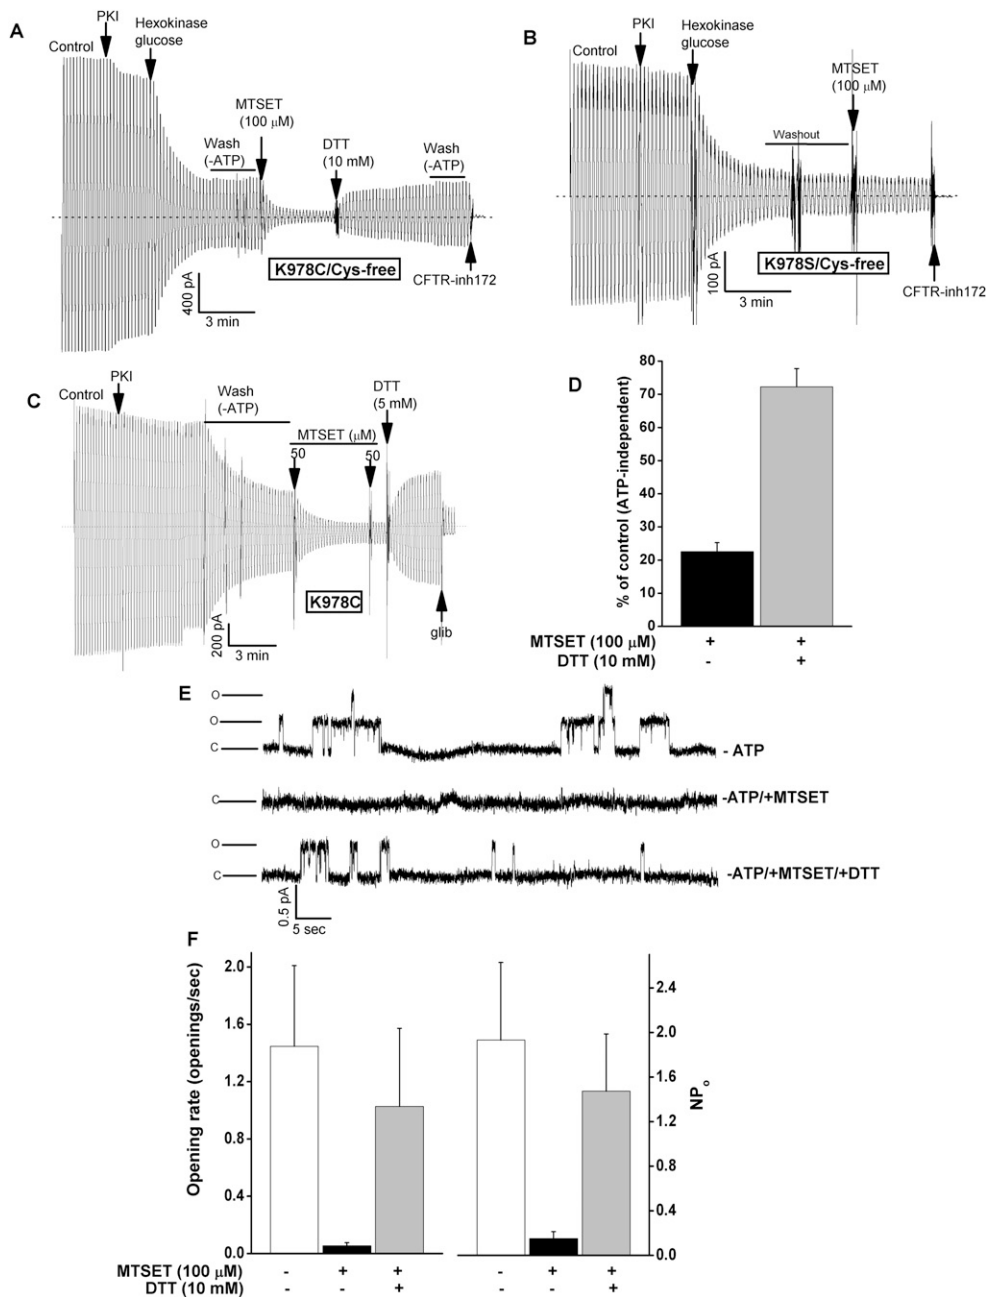

**Fig. S2.** Accessibility of K978C to thiol modification. (A) Positively charged MTSET [Fu J, Kirk KL (2001) Cysteine substitutions reveal dual functions of the amino-terminal tail in cystic fibrosis transmembrane regulator channel gating. *J Biol Chem* 276:35660–35668] reversibly inhibited the ATP-independent current mediated by the K978C mutant (cysteine-free background). (B) There was no effect of MTSET on the K978S mutant in the cysteine-free background. (C) Similar inhibitory effect of MTSET on the K978C mutant in the WT background (contains native cysteines). (D) Mean data ( $\pm$ SEMs) showing degree of MTSET inhibition and DTT recovery for K978C-cysteine-free-CFTR ( $n = 5$ ). (E) Single-channel traces in gap-free recording mode for K978C (cysteine-free background) following ATP removal by hexokinase/glucose addition (+60-mV holding potential; patch obtained using small-tipped pipette). (Top) "Control" trace after ATP removal. Note that these channels open and close spontaneously in the absence of ATP. (Middle) After addition of 100  $\mu$ M MTSET. (Bottom) After subsequent addition of 10 mM DTT. (F) Mean data ( $\pm$ SEMs) showing magnitudes of effects of MTSET and DTT on channel opening rate (openings/seconds per patch) and NP<sub>0</sub> ( $n = 5$ ).



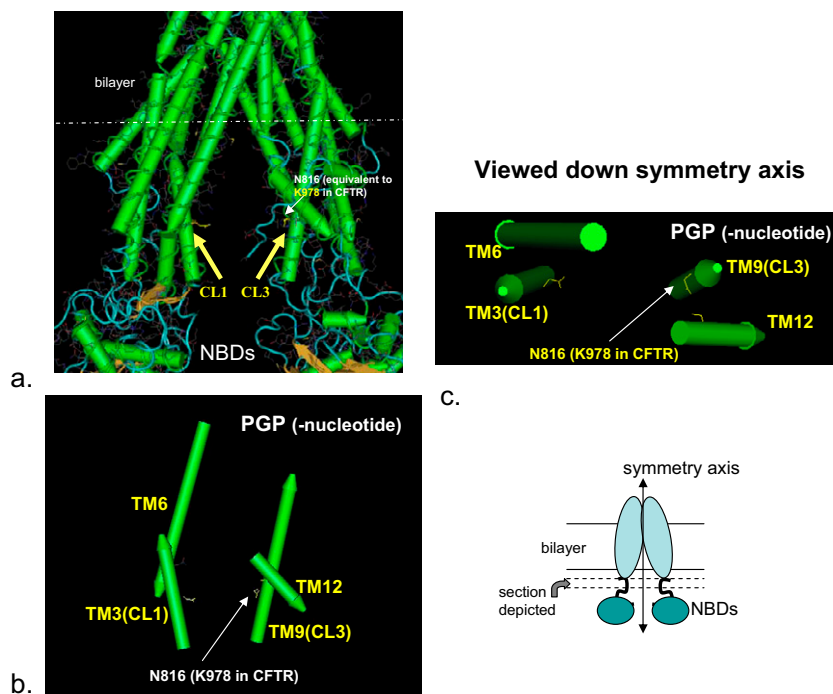

**Fig. S5.** Orientations of cytosolic loops 1 and 3 in the nucleotide-free P-glycoprotein (PGP) structure. Loops 1 and 3 remain along the symmetry axis but are farther apart compared to the nucleotide-bound Sav1866 structure. Here, loop 3 closely opposes the cytosolic extension of TM12. Conceivably, loop 3 mutations promote constitutive activity by destabilizing the latter interaction [Aller SG, et al. (2009) Structure of P-glycoprotein reveals a molecular basis for poly-specific drug binding. *Science* 323:1718–1722].

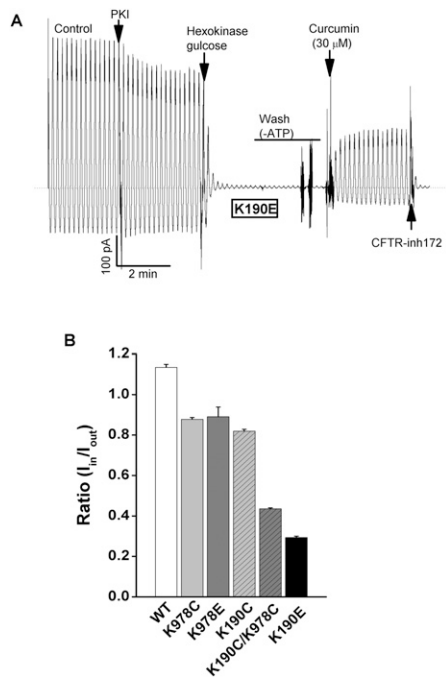

**Fig. S6.** Current rectification by loop mutants. (A) K190E-CFTR current trace showing rectifying current behavior. (B) Mean data ( $\pm$ SEMs) showing degree of rectification exhibited by indicated loop mutants ( $n = 3-19$ ). The stronger rectification of the K190E mutant might be attributable to this position being relatively near the inner pore vestibule.

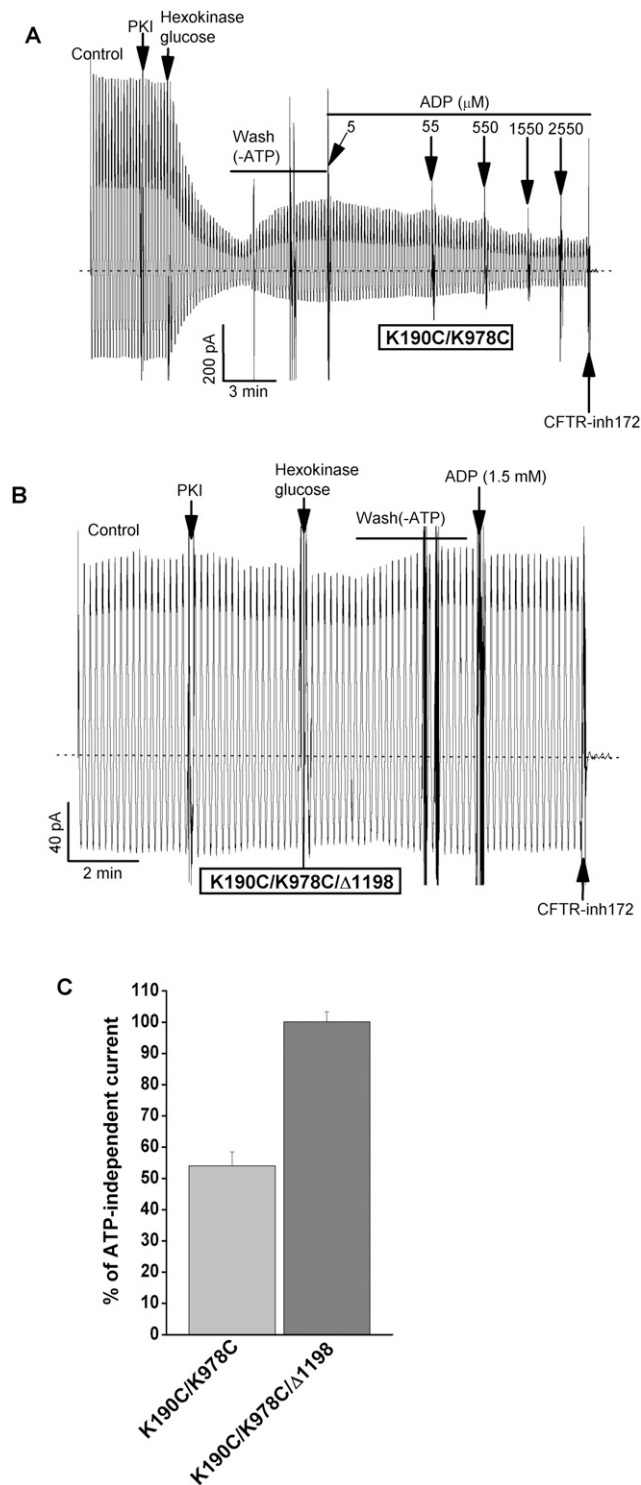

**Fig. S7.** ADP does not inhibit current by the constitutive loop mutant in the absence of NBD2. (A) ADP inhibits ATP-independent current mediated by K190C/K978C-CFTR in a dose-dependent fashion. (B) ADP does not inhibit the current mediated by the same loop mutant in a truncation construct lacking NBD2 ( $\Delta$ 1198-CFTR) [Wang W, Bernard K, Li G, Kirk KL (2007) Curcumin opens cystic fibrosis transmembrane conductance regulator channels by a novel mechanism that requires neither ATP binding nor dimerization of the nucleotide-binding domains. *J Biol Chem* 282:4533–4544]. (C) Mean inhibition ( $\pm$ SEMs) by 1.5 mM ADP of currents mediated by the indicated constructs ( $n = 4$ –6).

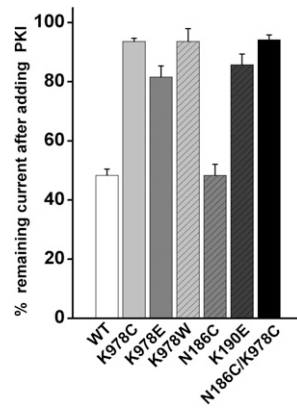

**Fig. S8.** Most loop 1 and 3 mutants reduce the degree of current inhibition by PKI (conditions described in legend for Fig. 1). Means  $\pm$  SEMs ( $n = 4-18$ ).

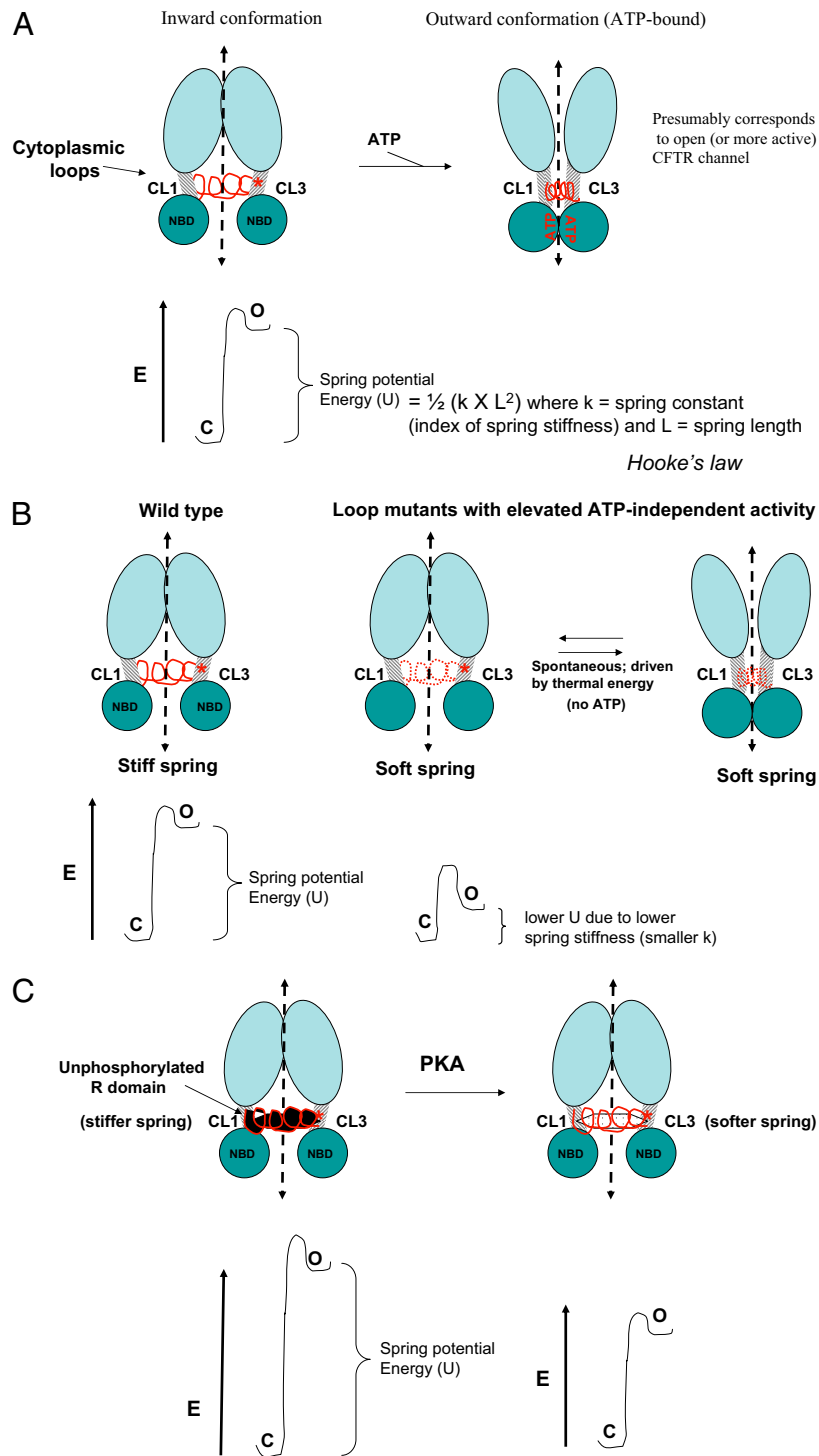

**Fig. S9.** Cytoplasmic loops as a compression spring. (A) Loops are modeled as a simple compression spring whose potential energy and stiffness are given by Hooke's law. The same general concepts would apply if the loops behaved more like a torsion (rotary) spring. (B) Certain loop mutations may promote ATP-independent activity by reducing spring stiffness (e.g., by disrupting loop-transmembrane domain interactions that normally stabilize the inactive state of the channel). (C) R domain may also regulate spring stiffness by interacting with the loops.
